# Supplementary material for: Post-Transplant Diabetes Mellitus in Kidney-Transplanted Patients: Related Factors and Impact on Long-Term Outcome
Source: MDPI journal article supplement (doi:10.3390/nu16101520), 2024-05-17
Supplement: s1 [file s1]

**Table S1.** Division into groups of studied patients.

| Groups | Features                                               | Number of Patients |
|--------|--------------------------------------------------------|--------------------|
| T      | Total patients                                         | 879                |
| L      | Patients lost at follow up                             | 18                 |
| E      | Patients that didn't reach 6 months of RTX             | 29                 |
| S      | Patients studied                                       | 832                |
| ND     | NON-diabetic patients                                  | 595                |
| D      | All diabetic patients                                  | 237                |
| D1     | Diabetic patients before transplantation               | 51                 |
| PTDM+  | Diabetic patients after transplantation                | 186                |
| AMG+   | Diabetic and prediabetic patients (IFG or IGT) at OGTT | 113 (23+90)        |
| AMG-   | Patients without OGTT alterations                      | 371                |

**Table S2.** Immunosuppressive Therapy; Notes: ATG: Anti-thymocyte globulin; MMF: mycophenolate; \* = ND vs. D, ^ = ND vs. PTDM+, ° = AMG+ vs. AMG-. ND: non-diabetic; D: diabetic; PTDM+: post-transplant diabetes mellitus; AMG-: no alterations in glucose metabolism; AMG+: alterations in glucose metabolism. Non significant *p*-values are reported.

| Parameters                              | T<br>(n = 832) | ND<br>(n = 595) | D (n = 237)   | PTDM+<br>(n = 186) | AMG+<br>(n = 113) | AMG-<br>(n = 371) | <i>p</i>                   |
|-----------------------------------------|----------------|-----------------|---------------|--------------------|-------------------|-------------------|----------------------------|
| Cumulative dose of steroids at T12 (mg) | 2914 ± 962     | 2923 ± 880      | 2893 ± 1144   | 2950 ± 1055        | 2934 ± 1003       | 2921 ± 769        | *0.696<br>^0.724<br>°0.881 |
| Basiliximab , %                         | 77.7%          | 78.4%           | 75.8%         | 81.7%              | 72.6%             | 82.5%             | *0.459<br>^0.406<br>°0.022 |
| ATG, %                                  | 24.6%          | 22.9%           | 28.8%         | 22.0%              | 31.0%             | 19.9%             | *0.089<br>^0.920<br>°0.014 |
| Ciclosporin/Tacrolimus at T1, %         | 7.3%<br>92.7%  | 7.4%<br>92.6%   | 7.3%<br>92.7% | 8.2%<br>91.8%      | 5.3%<br>94.7%     | 4.9%<br>95.1%     | *0.348<br>^0.212<br>°0.806 |
| MMF at T1, %                            | 94.6%          | 94.2%           | 95.8%         | 96.8%              | 92.9%             | 95.7%             | *0.398<br>^0.188<br>°0.221 |
| mTor inhibitors at T1, %                | 2.7%           | 2.6%            | 3.0%          | 3.2%               | 3.5%              | 2.2%              | *0.812<br>^0.609<br>°0.486 |
| Ciclosporin/Tacrolimus at T12, %        | 7.9%<br>92.1%  | 7.4%<br>92.6%   | 9.2%<br>90.8% | 10.7%<br>89.3%     | 7.2%<br>92.8%     | 5.8%<br>94.2%     | *0.609<br>^0.371<br>°0.406 |
| MMF at T12, %                           | 91.1%          | 92.3%           | 88.4%         | 89.6%              | 88.3%             | 94.4%             | *0.099<br>^0.281<br>°0.035 |
| mTor inhibitors at T12, %               | 5.8%           | 4.9%            | 7.8%          | 8.2%               | 7.1%              | 5.4%              | *0.132<br>^0.100<br>°0.489 |

**Table S3.** Comparison of clinical and biochemical parameters between ND and D groups; Notes: ND: non-diabetic; D: diabetic; eGFR: estimated glomerular filtration rate BMI: body mass index; SBP: systolic blood pressure; CRP: C-Reactive protein; Only the significant p-values parameters are shown; Significant p-values are in bold.

| Parameters                     | 1st Month<br>ND     | 1st Month<br>D      | <i>p</i>         | 6th Month<br>ND     | 6th Month<br>D      | <i>p</i>         | 12th Month<br>ND    | 12th Month<br>D     | <i>p</i>         |
|--------------------------------|---------------------|---------------------|------------------|---------------------|---------------------|------------------|---------------------|---------------------|------------------|
| eGFR (mL/min)                  | 66 ± 26             | 60 ± 26             | <b>0.003</b>     | 65 ± 23             | 57 ± 22             | <b>&lt;0.001</b> | 66 ± 24             | 59 ± 20             | <b>&lt;0.001</b> |
| Creatinine (mg/dL)             | 1.43 ± 0.59         | 1.50 ± 0.49         | 0.131            | 1.41 ± 0.45         | 2.20 ± 0.59         | 0.074            | 1.39 ± 0.46         | 1.46 ± 0.42         | <b>0.036</b>     |
| Proteinuria (g/24h)            | 0.20<br>[0.14–0.30] | 0.22<br>[0.15–0.32] | 0.065            | 0.17<br>[0.11–0.25] | 0.18<br>[0.12–0.29] | <b>0.029</b>     | 0.16<br>[0.10–0.25] | 0.19<br>[0.12–0.30] | <b>0.001</b>     |
| BMI (kg/m <sup>2</sup> )       | 22 ± 3              | 24 ± 3              | <b>&lt;0.001</b> | -                   | -                   | -                | 23 ± 3              | 25 ± 3              | <b>&lt;0.001</b> |
| SBP (mmHg)                     | 130 ± 16            | 132 ± 16            | 0.093            | 130 ± 17            | 133 ± 18            | <b>0.009</b>     | 129 ± 16            | 132 ± 17            | <b>0.022</b>     |
| Glucose (mg/dL)                | 82 ± 15             | 104 ± 31            | <b>&lt;0.001</b> | 85 ± 12             | 106 ± 34            | <b>&lt;0.001</b> | 82 ± 13             | 103 ± 34            | <b>&lt;0.001</b> |
| Glycated hemoglobin (mmol/mol) | 33 ± 5              | 41 ± 8              | <b>&lt;0.001</b> | 36 ± 5              | 44 ± 9              | <b>&lt;0.001</b> | 35 ± 3              | 46 ± 9              | <b>&lt;0.001</b> |
| Total cholesterol (mg/dL)      | 210 ± 49            | 216 ± 56            | 0.100            | 197 ± 45            | 207 ± 45            | <b>0.004</b>     | 192 ± 41            | 201 ± 46            | <b>0.009</b>     |
| HDL cholesterol (mg/dL)        | 62 ± 19             | 59 ± 20             | 0.076            | 56 ± 19             | 55 ± 18             | 0.485            | 57 ± 18             | 54 ± 15             | <b>0.020</b>     |
| Triglycerides (mg/dL)          | 158 ± 74            | 182 ± 104           | <b>&lt;0.001</b> | 154 ± 75            | 173 ± 89            | <b>0.002</b>     | 142 ± 67            | 163 ± 68            | <b>&lt;0.001</b> |
| CRP (mg/dL)                    | 0.14<br>[0.06–0.48] | 0.27<br>[0.10–0.60] | <b>0.002</b>     | 0.11<br>[0.06–0.27] | 0.18<br>[0.09–0.33] | <b>0.008</b>     | 0.11<br>[0.06–0.29] | 0.19<br>[0.09–0.45] | <b>&lt;0.001</b> |

**Table S4.** Comparison of clinical and biochemical parameters between ND and D groups; Notes: ND: non-diabetic; D: diabetic; BMI: body mass index; DBP: diastolic blood pressure; PTH: parathormone; Ca: Calcium ; P: Phosphorus ; Mg: Magnesium ; 25-OH VitaminD; 1-25OH(D): 1-25-OH VitaminD. Non significant p-values are reported.

| Parameters                 | 1st Month<br>ND      | 1st Month<br>D       | <i>p</i> | 6th Month<br>ND      | 6th Month<br>D       | <i>p</i> | 12th Month<br>ND     | 12th Month<br>D      | <i>p</i>     |
|----------------------------|----------------------|----------------------|----------|----------------------|----------------------|----------|----------------------|----------------------|--------------|
| DBP (mmHg)                 | 79 ± 10              | 79 ± 10              | 0.618    | 80 ± 10              | 79 ± 10              | 0.310    | 79 ± 10              | 79 ± 9               | 0.411        |
| Uric acid (mg/dL)          | 5.78 ± 1.48          | 5.82 ± 1.82          | 0.760    | 6.49 ± 1.48          | 6.55 ± 1.62          | 0.593    | 6.50 ± 1.50          | 6.65 ± 1.66          | 0.216        |
| Hemoglobin (g/dL)          | 11.0 ± 1.36          | 10.89 ± 1.36         | 0.233    | 12.32 ± 1.53         | 12.22 ± 1.36         | 0.354    | 12.81 ± 1.66         | 12.65 ± 1.45         | 0.180        |
| Albumin (g/dL)             | 4.15 ± 0.43          | 4.11 ± 0.42          | 0.220    | 4.42 ± 0.36          | 4.36 ± 0.37          | 0.061    | 4.42 ± 0.34          | 4.36 ± 0.40          | 0.064        |
| PTH (pg/mL)                | 64<br>[39–103]       | 61<br>[37–107]       | 0.535    | 56<br>[39–91]        | 61<br>[37–98]        | 0.710    | 56<br>[38–89]        | 54<br>[35–83]        | 0.261        |
| Ca (mg/dL)                 | 9.76 ± 0.80          | 9.67 ± 0.76          | 0.132    | 9.86 ± 0.76          | 9.81 ± 0.62          | 0.357    | 9.83 ± 0.74          | 9.80 ± 0.58          | 0.666        |
| P (mg/dL)                  | 2.55 ± 0.88          | 2.53 ± 0.96          | 0.769    | 3.09 ± 0.71          | 3.12 ± 0.68          | 0.550    | 3.12 ± 0.65          | 3.17 ± 0.61          | 0.308        |
| Mg (mg/dL)                 | 1.63 ± 0.23          | 1.62 ± 0.21          | 0.548    | 1.74 ± 0.21          | 1.73 ± 0.24          | 0.862    | 1.70 ± 0.21          | 1.74 ± 0.30          | 0.230        |
| Insulinemia (μIU/mL)       | 8.50<br>[6.20–11.70] | 9.90<br>[6.30–13.05] | 0.077    | 8.20<br>[5.80–11.55] | 8.17<br>[6.00–12.20] | 0.343    | 8.60<br>[6.00–11.30] | 8.70<br>[5.90–11.90] | 0.893        |
| Alkaline phosphatase (U/L) | 87<br>[67–117]       | 90<br>[69–127]       | 0.174    | 88<br>[66–125]       | 95<br>[71–123]       | 0.076    | 81<br>[60–109]       | 88<br>[66–113]       | <b>0.037</b> |
| 25OH(D) (ng/dL)            | 14.54 ± 7.91         | 14.17 ± 7.99         | 0.592    | 16.65 ± 9.65         | 16.84 ± 10.95        | 0.839    | 19.15 ± 10.73        | 19.45 ± 13.32        | 0.762        |
| 1-25OH(D) (ng/dL)          | 38.39 ± 24.02        | 38.18 ± 23.49        | 0.936    | 49.69 ± 21.14        | 47.66 ± 20.07        | 0.369    | 53.11 ± 21.54        | 50.97 ± 19.16        | 0.343        |

**Table S5.** Comparison of clinical and biochemical parameters between the ND and PTDM+ groups. ND: non-diabetic; PTDM+: post-transplant diabetes mellitus; eGFR: estimated glomerular filtration rate BMI: body mass index; SBP: systolic blood pressure; CRP: C-Reactive protein; Only the significant *p*-values parameters are shown; Significant *p*-values are in bold.

| Parameters                     | 1st Month<br>ND      | 1st Month<br>PTDM+   | <i>p</i>         | 6th Month<br>ND      | 6th Month<br>PTDM+   | <i>p</i>         | 12th Month<br>ND     | 12th Month<br>PTDM+  | <i>p</i>         |
|--------------------------------|----------------------|----------------------|------------------|----------------------|----------------------|------------------|----------------------|----------------------|------------------|
| eGFR (mL/min)                  | 66 ± 26              | 60 ± 26              | <b>0.012</b>     | 65 ± 23              | 57 ± 2255            | <b>&lt;0.001</b> | 66 ± 24              | 59 ± 20              | <b>0.001</b>     |
| Creatinine (mg/dL)             | 1.43 ± 0.59          | 1.48 ± 0.49          | 0.150            | 1.41 ± 0.45          | 2.39 ± 11.96         | <b>0.050</b>     | 1.39 ± 0.46          | 1.47 ± 0.42          | <b>0.042</b>     |
| Proteinuria (g/24h)            | 0.20<br>[0.14–0.30]  | 0.21<br>[0.15–0.31]  | 0.176            | 0.17<br>[0.11–0.25]  | 0.18<br>[0.12–0.28]  | 0.218            | 0.16<br>[0.10–0.25]  | 0.18<br>[0.12–0.30]  | <b>0.006</b>     |
| BMI (kg/m <sup>2</sup> )       | 22 ± 3               | 24 ± 3               | <b>&lt;0.001</b> | -                    | -                    | -                | 23 ± 3               | 25 ± 3               | <b>&lt;0.001</b> |
| SBP (mmHg)                     | 130 ± 16             | 132 ± 16             | 0.084            | 130 ± 17             | 134 ± 18             | <b>0.006</b>     | 129 ± 16             | 132 ± 17             | <b>0.013</b>     |
| Blood glucose (mg/dL)          | 82 ± 15              | 100 ± 29             | <b>&lt;0.001</b> | 85 ± 12              | 100 ± 26             | <b>&lt;0.001</b> | 82 ± 13              | 96 ± 23              | <b>&lt;0.001</b> |
| Insulinemia (μIU/mL)           | 8.50<br>[6.20–11.70] | 9.90<br>[7.00–13.00] | <b>0.035</b>     | 8.20<br>[5.80–11.55] | 8.25<br>[6.00–12.35] | 0.176            | 8.60<br>[6.00–11.30] | 8.80<br>[5.90–11.90] | 0.728            |
| Glycated hemoglobin (mmol/mol) | 33 ± 5               | 41 ± 8               | <b>&lt;0.001</b> | 36 ± 5               | 44 ± 8               | <b>&lt;0.001</b> | 35 ± 3               | 45 ± 7               | <b>&lt;0.001</b> |
| Total cholesterol (mg/dL)      | 210 ± 49             | 225 ± 51             | <b>&lt;0.001</b> | 197 ± 45             | 213 ± 45             | <b>&lt;0.001</b> | 192 ± 41             | 206 ± 45             | <b>&lt;0.001</b> |
| Triglycerides (mg/dL)          | 158 ± 74             | 187 ± 109            | <b>&lt;0.001</b> | 154 ± 75             | 177 ± 92             | <b>0.001</b>     | 142 ± 67             | 166 ± 71             | <b>&lt;0.001</b> |
| CRP (mg/dL)                    | 0.14<br>[0.06–0.48]  | 0.29<br>[0.10–0.60]  | <b>0.002</b>     | 0.11<br>[0.06–0.27]  | 0.20<br>[0.09–0.34]  | <b>0.002</b>     | 0.11<br>[0.06–0.29]  | 0.20<br>[0.09–0.46]  | <b>&lt;0.001</b> |

**Table S6.** Comparison of clinical and biochemical parameters between the ND and PTDM+ groups; Notes: ND: non-diabetic; PTDM+: post-transplant diabetes mellitus; DBP: diastolic blood pressure; PTH: parathormone; Ca: Calcium ; P: Phosphorus ; Mg: Magnesium ; 25-OH VitaminD; 1-25OH(D): 1-25-OH VitaminD. Not significant *p*-values are reported.

| Parameters                 | 1st Month<br>ND | 1st Month<br>PTDM+ | <i>p</i> | 6th Month<br>ND | 6th Month<br>PTDM+ | <i>p</i> | 12th Month<br>ND | 12th Month<br>PTDM+ | <i>p</i> |
|----------------------------|-----------------|--------------------|----------|-----------------|--------------------|----------|------------------|---------------------|----------|
| DBP (mmHg)                 | 79 ± 10         | 79 ± 9             | 0.899    | 80 ± 10         | 80 ± 9             | 0.801    | 79 ± 10          | 80 ± 9              | 0.867    |
| Uric acid (mg/dL)          | 5.78 ± 1.48     | 5.91 ± 1.84        | 0.373    | 6.49 ± 1.48     | 6.62 ± 1.60        | 0.268    | 6.50 ± 1.50      | 6.75 ± 1.58         | 0.050    |
| Hemoglobin (g/dL)          | 11.01 ± 1.36    | 10.92 ± 1.36       | 0.401    | 12.32 ± 1.53    | 12.26 ± 1.39       | 0.612    | 12.81 ± 1.66     | 12.65 ± 1.49        | 0.229    |
| Albumin (g/dL)             | 4.15 ± 0.43     | 4.15 ± 0.38        | 0.959    | 4.42 ± 0.36     | 4.39 ± 0.36        | 0.382    | 4.42 ± 0.34      | 4.40 ± 0.39         | 0.594    |
| PTH (pg/mL)                | 64<br>[39–103]  | 62<br>[38–107]     | 0.613    | 56<br>[39–91]   | 61<br>[37–95]      | 0.793    | 56<br>[38–89]    | 55<br>[35–80]       | 0.331    |
| Ca (mg/dL)                 | 9.76 ± 0.80     | 9.69 ± 0.79        | 0.270    | 9.86 ± 0.76     | 9.81 ± 0.62        | 0.468    | 9.83 ± 0.74      | 9.80 ± 0.57         | 0.694    |
| P (mg/dL)                  | 2.55 ± 0.88     | 2.55 ± 0.99        | 0.970    | 3.09 ± 0.71     | 3.13 ± 0.69        | 0.514    | 3.12 ± 0.65      | 3.20 ± 0.61         | 0.144    |
| Mg (mg/dL)                 | 1.63 ± 0.23     | 1.61 ± 0.19        | 0.457    | 1.74 ± 0.21     | 1.77 ± 0.23        | 0.358    | 1.70 ± 0.21      | 1.73 ± 0.34         | 0.492    |
| Alkaline phosphatase (U/L) | 87<br>[67–117]  | 90<br>[69–124]     | 0.352    | 88<br>[66–125]  | 94<br>[71–122]     | 0.106    | 81<br>[60–109]   | 88<br>[67–112]      | 0.077    |
| HDL cholesterol (mg/dL)    | 62 ± 19         | 60 ± 21            | 0.330    | 56 ± 19         | 55 ± 19            | 0.660    | 57 ± 18          | 54 ± 16             | 0.082    |
| 25OH(D) (ng/dL)            | 14.54 ± 7.91    | 13.77 ± 7.26       | 0.307    | 16.65 ± 9.65    | 16.83 ± 11.26      | 0.858    | 19.15 ± 10.73    | 19.58 ± 13.75       | 0.708    |
| 1-25OH(D) (ng/dL)          | 38.39 ± 24.02   | 38.88 ± 25.94      | 0.873    | 49.69 ± 21.14   | 49.15 ± 19.95      | 0.857    | 53.11 ± 21.54    | 52.15 ± 19.90       | 0.724    |

**Table S7.** Comparison of clinical and biochemical parameters between the AMG– and AMG+ groups; Notes: AMG–: no alterations in glucose metabolism; AMG+: alterations in glucose metabolism; eGFR: estimated glomerular filtration rate BMI: body mass index; SBP: systolic blood pressure; DBP: diastolic blood pressure; PTH: parathormone; CRP: C-Reactive protein; 25-OH VitaminD. Significant *p*-values are in bold.

| Parameters                     | 1st Month<br>AMG–   | 1st Month<br>AMG+   | <i>p</i>         | 6th Month<br>AMG–   | 6th Month<br>AMG+   | <i>p</i>         | 12th Month<br>AMG–  | 12th Month<br>AMG+  | <i>p</i>         |
|--------------------------------|---------------------|---------------------|------------------|---------------------|---------------------|------------------|---------------------|---------------------|------------------|
| eGFR (mL/min)                  | 67 ± 25             | 59 ± 22             | <b>0.004</b>     | 65 ± 23             | 58 ± 23             | <b>0.002</b>     | 67 ± 23             | 60 ± 26             | <b>0.004</b>     |
| Creatinine (mg/dL)             | 1.38 ± 0.46         | 1.51 ± 0.59         | <b>0.015</b>     | 1.82 ± 8.45         | 1.54 ± 0.51         | 0.725            | 1.34 ± 0.38         | 1.49 ± 0.54         | <b>0.001</b>     |
| Proteinuria (g/24h)            | 0.20<br>[0.14–0.30] | 0.21<br>[0.14–0.33] | 0.215            | 0.17<br>[0.11–0.24] | 0.18<br>[0.12–0.28] | 0.067            | 0.17<br>[0.10–0.25] | 0.19<br>[0.12–0.26] | <b>0.045</b>     |
| BMI (kg/m <sup>2</sup> )       | 22.88 ± 3.66        | 24.25 ± 3.41        | <b>0.001</b>     | -                   | -                   | -                | 23.87 ± 3.74        | 24.91 ± 3.23        | <b>0.009</b>     |
| SBP (mmHg)                     | 129 ± 16            | 131 ± 16            | 0.216            | 129 ± 16            | 132 ± 14            | 0.101            | 127 ± 15            | 133 ± 17            | <b>0.002</b>     |
| DBP (mmHg)                     | 79 ± 10             | 79 ± 9              | 0.900            | 79 ± 10             | 79 ± 9              | 0.848            | 79 ± 10             | 81 ± 9              | <b>0.023</b>     |
| Uric acid (mg/dL)              | 5.70 ± 1.54         | 5.88 ± 1.60         | 0.300            | 6.35 ± 1.43         | 6.52 ± 1.64         | 0.313            | 6.33 ± 1.36         | 6.66 ± 1.55         | <b>0.031</b>     |
| PTH (pg/mL)                    | 57<br>[36–100]      | 68<br>[45–121]      | 0.055            | 51<br>[37–86]       | 68<br>[40–106]      | <b>0.020</b>     | 51<br>[35–81]       | 68<br>[40–106]      | <b>0.011</b>     |
| Blood glucose (mg/dL)          | 80 ± 13             | 92 ± 21             | <b>&lt;0.001</b> | 85 ± 11             | 99 ± 12             | <b>&lt;0.001</b> | 81 ± 11             | 94 ± 16             | <b>&lt;0.001</b> |
| Glycated hemoglobin (mmol/mol) | 34 ± 5              | 37 ± 6              | <b>&lt;0.001</b> | 37 ± 5              | 41 ± 6              | <b>&lt;0.001</b> | 37 ± 4              | 41 ± 6              | <b>&lt;0.001</b> |
| HDL cholesterol (mg/dL)        | 62 ± 18             | 60 ± 22             | 0.476            | 56 ± 16             | 52 ± 14             | <b>0.051</b>     | 57 ± 17             | 53 ± 14             | <b>0.024</b>     |
| Triglycerides (mg/dL)          | 160 ± 75            | 163 ± 73            | 0.640            | 151 ± 67            | 179 ± 94            | <b>0.001</b>     | 138 ± 61            | 158 ± 73            | <b>0.006</b>     |
| CRP (mg/dL)                    | 0.14<br>[0.06–0.40] | 0.25<br>[0.09–0.74] | <b>0.032</b>     | 0.10<br>[0.05–0.26] | 0.16<br>[0.10–0.40] | <b>&lt;0.001</b> | 0.11<br>[0.06–0.30] | 0.19<br>[0.10–0.40] | <b>&lt;0.001</b> |
| 25OH(D) (ng/dL)                | 14.96 ± 7.74        | 12.85 ± 6.49        | <b>0.022</b>     | 16.64 ± 9.59        | 16.54 ± 11.20       | 0.930            | 19.22 ± 10.99       | 18.23 ± 11.72       | 0.461            |

**Table S8.** Comparison of clinical and biochemical parameters between the AMG– and AMG+ groups; Notes: AMG–: no alterations in glucose metabolism; AMG+: alterations in glucose metabolism; Ca: Calcium ; P: Phosphorus ; Mg: Magnesium ; 1-25OH(D): 1-25-OH VitaminD. Not significant *p*-values are reported.

| Parameters                 | 1st Month<br>AMG–    | 1st Month<br>AMG+     | <i>p</i> | 6th Month<br>AMG–    | 6th Month<br>AMG+    | <i>p</i> | 12th Month<br>AMG–   | 12th Month<br>AMG+   | <i>p</i> |
|----------------------------|----------------------|-----------------------|----------|----------------------|----------------------|----------|----------------------|----------------------|----------|
| Hemoglobin (g/dL)          | 11.01 ± 1.36         | 10.99 ± 1.26          | 0.871    | 12.31 ± 1.45         | 12.35 ± 1.26         | 0.778    | 12.79 ± 1.55         | 12.62 ± 1.42         | 0.323    |
| Albumin (g/dL)             | 4.20 ± 0.40          | 4.16 ± 0.41           | 0.350    | 4.45 ± 0.34          | 4.41 ± 0.39          | 0.264    | 4.43 ± 0.34          | 4.39 ± 0.33          | 0.316    |
| Ca (mg/dL)                 | 9.76 ± 0.78          | 9.68 ± 0.80           | 0.343    | 9.86 ± 0.69          | 9.86 ± 0.68          | 0.994    | 9.83 ± 0.72          | 9.78 ± 0.63          | 0.548    |
| P (mg/dL)                  | 2.58 ± 0.83          | 2.45 ± 0.85           | 0.143    | 3.10 ± 0.64          | 3.06 ± 0.75          | 0.564    | 3.14 ± 0.64          | 3.09 ± 0.57          | 0.432    |
| Mg (mg/dL)                 | 1.62 ± 0.25          | 1.63 ± 0.21           | 0.817    | 1.73 ± 0.19          | 1.79 ± 0.27          | 0.170    | 1.70 ± 0.22          | 1.71 ± 0.29          | 0.868    |
| Insulinemia (μIU/mL)       | 8.60<br>[6.35–11.63] | 10.00<br>[6.99–13.65] | 0.169    | 8.10<br>[5.90–11.48] | 9.25<br>[6.43–13.23] | 0.053    | 8.60<br>[5.90–10.90] | 7.60<br>[5.90–10.00] | 0.360    |
| Alkaline phosphatase (U/L) | 84<br>[67–112]       | 90<br>[70–129]        | 0.059    | 88<br>[65–119]       | 87<br>[66–122]       | 0.479    | 83<br>[60–105]       | 79<br>[65–116]       | 0.208    |
| Total cholesterol (mg/dL)  | 214 ± 47             | 212 ± 51              | 0.709    | 199 ± 43             | 207 ± 49             | 0.078    | 193 ± 38             | 200 ± 41             | 0.159    |
| 1-25OH(D) (ng/dL)          | 41.05 ± 24.4         | 41.60 ± 28.01         | 0.894    | 51.55 ± 21.31        | 50.51 ± 21.92        | 0.747    | 55.76 ± 21.04        | 49.28 ± 21.72        | 0.053    |
